# Supplementary material for: Modulation of Wnt/β-catenin signaling and proliferation by a ferrous iron chelator with therapeutic efficacy in genetically engineered mouse models of cancer
Source: PubMed Central journal article supplement — Oncogene. 2011 Jun 13;31(2):213–25. doi: 10.1038/onc.2011.228 (PMC3257471; doi:10.1038/onc.2011.228), 2011-06-13
Supplement: onc2011228x1.pdf [file onc2011228x1.pdf]

## Supplemental Figure 1

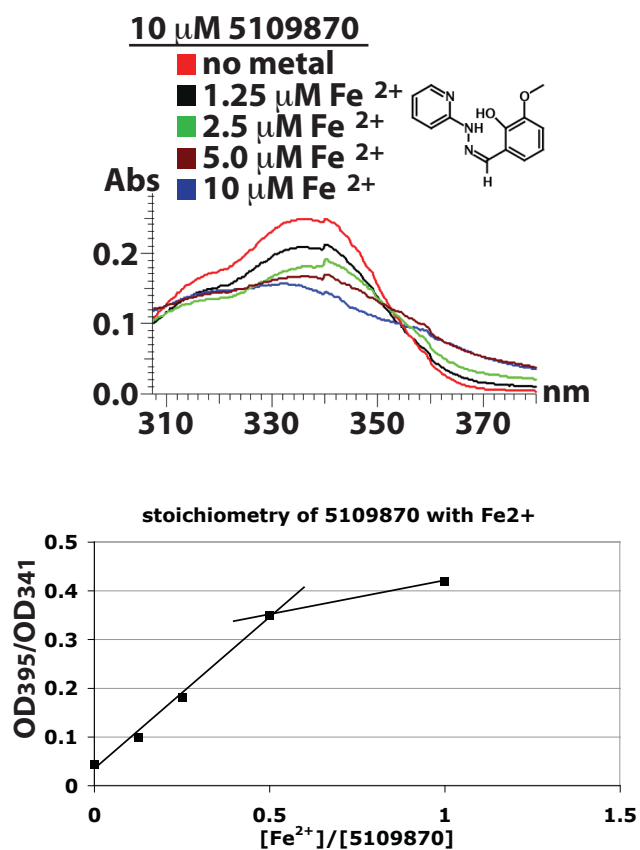

Supplemental figure 1. The novel Chembridge compound 5109870 in the CMAP database chelates  $\text{Fe}^{2+}$ .

Upper panel: 10  $\mu\text{M}$  5109870 (inset) was mixed with the indicated concentrations of  $\text{FeCl}_2$  and absorbance was measured from 310 to 380 nm. Lower panel: dose dependent changes in absorption at 341 and 395 nm were used to plot degree of saturation of binding. 5109870: $\text{Fe}^{2+}$  stoichiometry is 2:1.
