# Supplementary material for: Modulation of Wnt/β-catenin signaling and proliferation by a ferrous iron chelator with therapeutic efficacy in genetically engineered mouse models of cancer
Source: PubMed Central journal article supplement — Oncogene. 2011 Jun 13;31(2):213–25. doi: 10.1038/onc.2011.228 (PMC3257471; doi:10.1038/onc.2011.228), 2011-06-13
Supplement: onc2011228x2.pdf [file onc2011228x2.pdf]

Supplemental table 1. Primers used in qPCR studies.

| Gene             | pathway        | Forward primer                 | Reverse primer                   | Intron(s) spanned | Amplicon (nt) |
|------------------|----------------|--------------------------------|----------------------------------|-------------------|---------------|
| $\beta$ -actin   | housekeeping   | 5'-AAGGATTCCTATGTGGGCGACG-3'   | 5'-GCCTGGATAGCAACGTACATGG-3'     | 3                 | 266           |
| Axin2            | Wnt            | 5'-TCCTTATCGTGTGGGCAGTA-3'     | 5'-ACGGGGGTCATCTCCTTG-3'         | 4                 | 126           |
| $\beta$ -catenin | Wnt            | 5'-AGCTGACCAGCTCTCTTTCA-3'     | 5'-CCCATCAACTGGATAGTCAGC-3'      | 13 & 14           | 226           |
| COX-2            | Wnt            | 5'-CTTCACGCATCAGTTTTTCAAG-3'   | 5'-TCACCGTAAATATGATTTAAGTCCAC-3' | none              | 96            |
| c-Myc            | Wnt            | 5'-CACCAGCAGCGACTCTGA-3'       | 5'-GATCCAGACTCTGACCTTTTGC-3'     | 2                 | 102           |
| cyclin D1        | Wnt            | 5'-TGTCCTACTACCGCCTCACA-3'     | 5'-CAGGGCTTCGATCTGCTC-3'         | 4                 | 92            |
| PPAR $\Delta$    | Wnt            | 5'-CACTGGGCATGTCACACAA-3'      | 5'-CCCTCGTTTGCAGTCAGC-3'         | 6                 | 91            |
| ADM              | HIF-1 $\alpha$ | 5'-GCCTGCCAGACCCTTAT-3'        | 5'-GTAGCGCTTGACTCGGATG-3'        | 3                 | 100           |
| NDRG1            | HIF-1 $\alpha$ | 5'-CCTACATCCTAACTCGATTTGCTC-3' | 5'-GGGTCCATCCTGAGATCTTG-3'       | 7                 | 125           |
| PPFIA4           | HIF-1 $\alpha$ | 5'-GCCACTCAGATGCCAGA-3'        | 5'-TCCTTCTTCTCCTGAATCATCC-3'     | 2                 | 91            |
