# Supplementary material for: Modulation of Wnt/β-catenin signaling and proliferation by a ferrous iron chelator with therapeutic efficacy in genetically engineered mouse models of cancer
Source: PubMed Central journal article supplement — Oncogene. 2011 Jun 13;31(2):213–25. doi: 10.1038/onc.2011.228 (PMC3257471; doi:10.1038/onc.2011.228), 2011-06-13
Supplement: onc2011228x3.pdf [file onc2011228x3.pdf]

**Supplemental table 2. Structure Activity relationship (SAR) studies of compounds related to 5848633 and 5923764, the related hits from the STF3A cell based Wnt signaling inhibitor screen.**

LD<sub>50</sub> values for the reporter cell line after 24 hours treatment with a subset of these compounds were also determined. These studies indicate that additions to the phenyl ring and a wide array of amide-linked groups have little or no detrimental effect on signal inhibition. By contrast, additions such as chloride or nitrosyl groups on C5 of the 8 hydroxyquinolone group or variations in linker length between the phenyl ring and the 8 hydroxyquinolone significantly reduced efficacy.

Therapeutic Index was calculated as IC<sub>50</sub> divided by LD<sub>50</sub> at 24 hours for STF3A cells.

| compound ID    | structure | IC <sub>50</sub> (μM); Therapeutic index |
|----------------|-----------|------------------------------------------|
| 5923764        |           | 0.1<br>ND                                |
| 5843979        |           | 0.2<br>17                                |
| 5839152 (HQBA) |           | 0.3<br>108                               |
| 5837493        |           | 0.3<br>19                                |
| 5845469        |           | 0.3<br>7                                 |
| 5848633        |           | 0.3<br>8                                 |
| 5842373        |           | 0.6<br>6                                 |

|         |  |           |
|---------|--|-----------|
| 6385237 |  | 0.6<br>ND |
|---------|--|-----------|

| compound ID | structure | IC <sub>50</sub> (μM); Therapeutic index |
|-------------|-----------|------------------------------------------|
| 5837313     |           | 0.6<br>7                                 |
| 5925700     |           | 0.7<br>ND                                |
| 5842334     |           | 0.7<br>6                                 |
| 6997141     |           | 0.7<br>ND                                |
| 5847638     |           | 0.8<br>23                                |

|         |                                                                                   |               |
|---------|-----------------------------------------------------------------------------------|---------------|
| 7151628 | 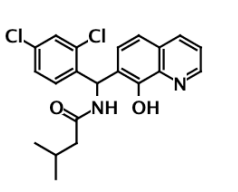 | 0.9<br><br>ND |
| 7160597 |  | 1.4<br><br>ND |
| 5925778 |  | 2.2<br><br>ND |

| compound ID | structure                                                                           | IC <sub>50</sub> (μM);<br>Therapeutic index |
|-------------|-------------------------------------------------------------------------------------|---------------------------------------------|
| 6965682     | 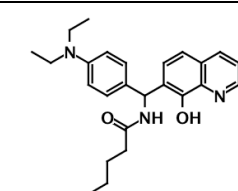  | 4.5<br><br>ND                               |
| 5923955     |  | 5.3<br><br>ND                               |
| 5925622     |  | 6.3<br><br>ND                               |
| 5924635     |  | 10.0<br><br>ND                              |
| 5927674     |  | 16.0<br><br>ND                              |

| compound ID | structure                                                                             | IC <sub>50</sub> (μM);<br>Therapeutic index |
|-------------|---------------------------------------------------------------------------------------|---------------------------------------------|
| 7171545     | 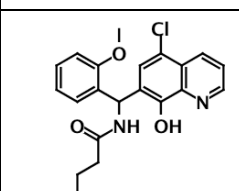  | 18.0<br><br>ND                              |
| 6951252     |  | 20.5<br><br>ND                              |
| 7125178     |  | 30.0<br><br>ND                              |
| 7185515     |  | 63.0<br><br>ND                              |
| 6997750     |  | >56.0<br><br>ND                             |
