# Supplementary material for: Modulation of Wnt/β-catenin signaling and proliferation by a ferrous iron chelator with therapeutic efficacy in genetically engineered mouse models of cancer
Source: PubMed Central journal article supplement — Oncogene. 2011 Jun 13;31(2):213–25. doi: 10.1038/onc.2011.228 (PMC3257471; doi:10.1038/onc.2011.228), 2011-06-13
Supplement: onc2011228x4.pdf [file onc2011228x4.pdf]

### Supplementary Table 3. Genes up and down regulated by HQBA

#### Genes upregulated by HQBA

| Column ID   | Gene Title                                                                       | Gene Symbol | p-value(MCF7 treatment vs. control) | Ratio(MCF7 treatment vs. control) | F(Treatment) |
|-------------|----------------------------------------------------------------------------------|-------------|-------------------------------------|-----------------------------------|--------------|
| 202912_at   | adrenomedullin                                                                   | ADM         | 3.81E-08                            | 19.84                             | 1,204.44     |
| 200632_s_at | N-myc downstream regulated 1                                                     | NDRG1       | 3.79E-08                            | 15.23                             | 1,206.51     |
| 214978_s_at | protein tyrosine phosphatase, receptor type, f polypeptide (PTPRF), interacting  | PPFIA4      | 9.78E-08                            | 13.11                             | 878.46       |
| 228499_at   | 6-phosphofructo-2-kinase/fructose-2,6-biphosphatase 4                            | PFKFB4      | 3.05E-08                            | 12.13                             | 1,297.76     |
| 227337_at   | ankyrin repeat domain 37                                                         | ANKRD37     | 1.49E-08                            | 12.08                             | 1,647.86     |
| 236180_at   | ---                                                                              | ---         | 1.05E-07                            | 10.46                             | 856.61       |
| 223553_s_at | docking protein 3                                                                | DOK3        | 1.31E-06                            | 10.23                             | 366.84       |
| 36711_at    | v-maf musculoaponeurotic fibrosarcoma oncogene homolog F (avian)                 | MAFF        | 2.30E-08                            | 9.61                              | 1,426.57     |
| 202973_x_at | family with sequence similarity 13, member A1                                    | FAM13A1     | 2.94E-10                            | 8.28                              | 6,116.26     |
| 219410_at   | transmembrane protein 45A                                                        | TMEM45A     | 3.17E-05                            | 7.91                              | 123.40       |
| 226348_at   | ---                                                                              | ---         | 1.35E-08                            | 7.86                              | 1,705.92     |
| 235153_at   | ring finger protein 183                                                          | RNF183      | 1.18E-06                            | 7.66                              | 380.47       |
| 209566_at   | insulin induced gene 2                                                           | INSIG2      | 1.46E-07                            | 7.35                              | 767.60       |
| 227868_at   | hypothetical LOC154761                                                           | LOC154761   | 1.13E-07                            | 7.09                              | 837.70       |
| 1558365_at  | ---                                                                              | ---         | 1.46E-06                            | 7.03                              | 353.54       |
| 202464_s_at | 6-phosphofructo-2-kinase/fructose-2,6-biphosphatase 3                            | PFKFB3      | 7.68E-09                            | 6.70                              | 2,058.66     |
| 226347_at   | ---                                                                              | ---         | 8.03E-08                            | 6.51                              | 938.48       |
| 227285_at   | chromosome 1 open reading frame 51                                               | C1orf51     | 4.29E-08                            | 6.19                              | 1,157.89     |
| 238551_at   | fucosyltransferase 11 (alpha (1,3) fucosyltransferase)                           | FUT11       | 1.22E-08                            | 6.06                              | 1,764.54     |
| 202934_at   | hexokinase 2                                                                     | HK2         | 1.19E-07                            | 6.02                              | 823.16       |
| 228483_s_at | TAF9B RNA polymerase II, TATA box binding protein (TBP)-associated factor, 31kDa | TAF9B       | 2.30E-06                            | 6.01                              | 303.17       |
| 226452_at   | pyruvate dehydrogenase kinase, isozyme 1                                         | PDK1        | 8.14E-08                            | 5.93                              | 934.13       |
| 221478_at   | BCL2/adenovirus E1B 19kDa interacting protein 3-like                             | BNIP3L      | 3.54E-09                            | 5.54                              | 2,667.16     |
| 228770_at   | G protein-coupled receptor 146                                                   | GPR146      | 1.07E-05                            | 5.48                              | 179.47       |
| 201968_s_at | phosphoglucomutase 1                                                             | PGM1        | 9.09E-08                            | 5.46                              | 900.22       |

|              |                                                                                                                                     |                 |             |      |          |
|--------------|-------------------------------------------------------------------------------------------------------------------------------------|-----------------|-------------|------|----------|
| 221009_s_at  | angiopoietin-like 4                                                                                                                 | ANGPTL4         | 5.13E-08    | 5.43 | 1,090.84 |
| 201313_at    | enolase 2 (gamma, neuronal)                                                                                                         | ENO2            | 1.89E-07    | 5.27 | 703.73   |
| 231786_at    | homeobox A13                                                                                                                        | HOXA13          | 8.65E-05    | 5.07 | 86.82    |
| 239798_at    | ---                                                                                                                                 | ---             | 0.000194913 | 5.03 | 65.00    |
| 217047_s_at  | family with sequence similarity 13, member A1                                                                                       | FAM13A1         | 2.86E-05    | 4.96 | 127.97   |
| 201848_s_at  | BCL2/adenovirus E1B 19kDa interacting protein 3                                                                                     | BNIP3           | 6.77E-09    | 4.94 | 2,146.81 |
| 210095_s_at  | insulin-like growth factor binding protein 3<br>pleckstrin homology domain containing, family A (phosphoinositide binding<br>specif | IGFBP3          | 8.63E-08    | 4.93 | 916.21   |
| 238013_at    | ---                                                                                                                                 | PLEKHA2         | 3.44E-05    | 4.91 | 119.91   |
| 221497_x_at  | egl nine homolog 1 (C. elegans)                                                                                                     | EGLN1           | 1.15E-09    | 4.87 | 3,884.44 |
| 210512_s_at  | vascular endothelial growth factor A                                                                                                | VEGFA           | 2.00E-07    | 4.83 | 691.14   |
| 227719_at    | SMAD family member 9                                                                                                                | SMAD9           | 2.69E-07    | 4.80 | 625.35   |
| 225750_at    | ---                                                                                                                                 | ---             | 3.62E-09    | 4.75 | 2,646.15 |
| 212558_at    | sprouty homolog 1, antagonist of FGF signaling (Drosophila)                                                                         | SPRY1           | 1.23E-05    | 4.74 | 171.18   |
| 224314_s_at  | egl nine homolog 1 (C. elegans)                                                                                                     | EGLN1           | 3.81E-07    | 4.61 | 556.36   |
| 209446_s_at  | chromosome 7 open reading frame 44                                                                                                  | C7orf44         | 7.38E-06    | 4.58 | 203.89   |
| 235850_at    | WD repeat domain 5B                                                                                                                 | WDR5B           | 1.03E-05    | 4.58 | 182.04   |
| 209189_at    | v-fos FBJ murine osteosarcoma viral oncogene homolog                                                                                | FOS             | 8.19E-08    | 4.57 | 932.27   |
| 212143_s_at  | insulin-like growth factor binding protein 3                                                                                        | IGFBP3          | 2.03E-06    | 4.57 | 316.18   |
| 218507_at    | hypoxia-inducible protein 2                                                                                                         | HIG2            | 7.21E-09    | 4.44 | 2,102.35 |
| 201170_s_at  | basic helix-loop-helix family, member e40                                                                                           | BHLHE40         | 1.46E-08    | 4.41 | 1,661.61 |
| 206686_at    | pyruvate dehydrogenase kinase, isozyme 1                                                                                            | PDK1            | 4.47E-06    | 4.39 | 242.00   |
| 230630_at    | adenylate kinase 3-like 1 /// adenylate kinase 3-like 2                                                                             | AK3L1 /// AK3L2 | 5.38E-05    | 4.35 | 102.65   |
| 209122_at    | adipose differentiation-related protein                                                                                             | ADFP            | 5.03E-08    | 4.25 | 1,097.44 |
| 1554452_a_at | hypoxia-inducible protein 2                                                                                                         | HIG2            | 4.37E-10    | 4.24 | 5,361.32 |
| 201169_s_at  | basic helix-loop-helix family, member e40                                                                                           | BHLHE40         | 1.94E-06    | 4.23 | 321.40   |
| 201849_at    | BCL2/adenovirus E1B 19kDa interacting protein 3                                                                                     | BNIP3           | 8.71E-08    | 4.17 | 913.43   |
| 226682_at    | RAR-related orphan receptor A                                                                                                       | RORA            | 2.65E-06    | 4.15 | 289.17   |
| 222847_s_at  | egl nine homolog 3 (C. elegans)                                                                                                     | EGLN3           | 2.78E-06    | 4.14 | 284.30   |
| 219232_s_at  | egl nine homolog 3 (C. elegans)                                                                                                     | EGLN3           | 9.13E-07    | 4.14 | 414.44   |
| 218498_s_at  | ERO1-like (S. cerevisiae)                                                                                                           | ERO1L           | 3.31E-07    | 4.12 | 583.32   |
| 223333_s_at  | angiopoietin-like 4                                                                                                                 | ANGPTL4         | 7.03E-06    | 4.06 | 207.34   |

|             |                                                            |                   |          |      |          |
|-------------|------------------------------------------------------------|-------------------|----------|------|----------|
| 230710_at   | ---                                                        | ---               | 1.60E-05 | 4.06 | 156.47   |
| 235857_at   | potassium channel tetramerisation domain containing 11     | KCTD11            | 4.27E-08 | 4.01 | 1,159.68 |
| 239619_at   | ---                                                        | ---               | 1.73E-05 | 3.94 | 152.18   |
| 221479_s_at | BCL2/adenovirus E1B 19kDa interacting protein 3-like       | BNIP3L            | 3.26E-09 | 3.94 | 2,740.24 |
| 236480_at   | ---                                                        | ---               | 1.66E-05 | 3.93 | 154.32   |
| 223046_at   | egl nine homolog 1 (C. elegans)                            | EGLN1             | 4.01E-09 | 3.92 | 2,556.89 |
| 219888_at   | sperm associated antigen 4                                 | SPAG4             | 2.51E-07 | 3.90 | 640.24   |
| 1568611_at  | ---                                                        | ---               | 5.93E-07 | 3.87 | 479.33   |
| 202935_s_at | SRY (sex determining region Y)-box 9                       | SOX9              | 5.26E-05 | 3.84 | 103.42   |
| 235948_at   | ribosomal modification protein rimK-like family member A   | RIMKLA            | 3.60E-08 | 3.83 | 1,227.97 |
| 202887_s_at | DNA-damage-inducible transcript 4                          | DDIT4             | 1.36E-07 | 3.81 | 787.42   |
| 218149_s_at | zinc finger protein 395                                    | ZNF395            | 1.30E-07 | 3.77 | 798.25   |
| 221123_x_at | zinc finger protein 395                                    | ZNF395            | 6.17E-06 | 3.75 | 216.70   |
| 59625_at    | nucleolar protein 3 (apoptosis repressor with CARD domain) | NOL3              | 3.01E-09 | 3.75 | 2,814.10 |
| 230612_at   | WD repeat domain 73, mRNA (cDNA clone IMAGE:4547992)       | WDR73             | 4.81E-06 | 3.72 | 236.00   |
| 227412_at   | protein phosphatase 1, regulatory (inhibitor) subunit 3E   | PPP1R3E           | 7.44E-07 | 3.67 | 444.05   |
| 44783_s_at  | hairy/enhancer-of-split related with YRPW motif 1          | HEY1              | 2.56E-09 | 3.64 | 2,970.41 |
| 212192_at   | potassium channel tetramerisation domain containing 12     | KCTD12            | 1.33E-05 | 3.63 | 166.74   |
| 206246_at   | 6-phosphofructo-2-kinase/fructose-2,6-biphosphatase 4      | PFKFB4            | 8.21E-05 | 3.55 | 88.45    |
| 206307_s_at | forkhead box D1                                            | FOXD1             | 9.55E-08 | 3.54 | 885.40   |
| 218274_s_at | ankyrin repeat and zinc finger domain containing 1         | ANKZF1            | 3.60E-08 | 3.50 | 1,227.37 |
| 201667_at   | gap junction protein, alpha 1, 43kDa                       | GJA1              | 8.30E-05 | 3.48 | 88.10    |
| 221567_at   | nucleolar protein 3 (apoptosis repressor with CARD domain) | NOL3              | 4.27E-08 | 3.47 | 1,159.64 |
| 212689_s_at | jumonji domain containing 1A                               | JMJD1A            | 2.48E-10 | 3.45 | 6,478.76 |
| 223216_x_at | zinc finger protein 395                                    | ZNF395            | 7.60E-06 | 3.44 | 201.82   |
| 232693_s_at | F-box protein 16 /// zinc finger protein 395               | FBXO16 /// ZNF395 | 3.87E-05 | 3.41 | 115.17   |
| 225342_at   | adenylate kinase 3-like 1 /// adenylate kinase 3-like 2    | AK3L1 /// AK3L2   | 9.05E-09 | 3.41 | 1,948.89 |
| 211527_x_at | vascular endothelial growth factor A                       | VEGFA             | 3.85E-07 | 3.40 | 554.27   |
| 206685_at   | HLA complex group 4                                        | HCG4              | 2.39E-07 | 3.38 | 650.69   |
| 229001_at   | protein phosphatase 1, regulatory (inhibitor) subunit 3E   | PPP1R3E           | 6.86E-06 | 3.32 | 208.99   |
| 244385_at   | Jumonji domain containing 2C (JMJD2C), mRNA                | JMJD2C            | 4.37E-05 | 3.30 | 110.34   |

|             |                                                                                                                                                |                  |             |      |          |
|-------------|------------------------------------------------------------------------------------------------------------------------------------------------|------------------|-------------|------|----------|
| 236513_at   | ---                                                                                                                                            | ---              | 0.000101326 | 3.29 | 82.10    |
| 227263_at   | chromosome 8 open reading frame 58                                                                                                             | C8orf58          | 1.51E-05    | 3.29 | 159.55   |
| 230864_at   | serine/threonine-protein kinase NIM1                                                                                                           | MGC42105         | 7.02E-06    | 3.27 | 207.36   |
| 1553220_at  | family with sequence similarity 117, member B                                                                                                  | FAM117B          | 0.000293302 | 3.23 | 56.06    |
| 204326_x_at | metallothionein 1X                                                                                                                             | MT1X             | 2.50E-07    | 3.23 | 640.70   |
| 224345_x_at | family with sequence similarity 162, member A                                                                                                  | FAM162A          | 2.66E-10    | 3.21 | 6,324.77 |
| 203282_at   | glucan (1,4-alpha-), branching enzyme 1                                                                                                        | GBE1             | 7.99E-08    | 3.18 | 940.10   |
| 226431_at   | family with sequence similarity 117, member B                                                                                                  | FAM117B          | 3.93E-06    | 3.17 | 252.85   |
| 209535_s_at | ---                                                                                                                                            | ---              | 3.16E-06    | 3.15 | 272.17   |
| 201250_s_at | solute carrier family 2 (facilitated glucose transporter), member 1                                                                            | SLC2A1           | 8.22E-08    | 3.15 | 931.37   |
| 202936_s_at | SR Y (sex determining region Y)-box 9                                                                                                          | SOX9             | 2.34E-07    | 3.15 | 655.19   |
| 207543_s_at | prolyl 4-hydroxylase, alpha polypeptide I                                                                                                      | P4HA1            | 3.78E-08    | 3.14 | 1,208.35 |
| 223193_x_at | family with sequence similarity 162, member A                                                                                                  | FAM162A          | 1.10E-08    | 3.14 | 1,826.83 |
| 204348_s_at | adenylate kinase 3-like 1 /// adenylate kinase 3-like 2<br>pleckstrin homology domain containing, family A (phosphoinositide binding<br>specif | AK3L1 /// AK3L2  | 7.02E-08    | 3.12 | 981.92   |
| 225136_at   | WD repeat and SOCS box-containing 1                                                                                                            | PLEKHA2          | 1.96E-06    | 3.12 | 320.10   |
| 201294_s_at | vascular endothelial growth factor A                                                                                                           | WSB1             | 8.26E-05    | 3.10 | 88.27    |
| 212171_x_at | vascular endothelial growth factor A                                                                                                           | VEGFA            | 1.54E-06    | 3.10 | 347.33   |
| 205493_s_at | dihydropyrimidinase-like 4                                                                                                                     | DPYSL4           | 3.24E-07    | 3.08 | 587.37   |
| 204347_at   | adenylate kinase 3-like 1 /// adenylate kinase 3-like 2                                                                                        | AK3L1 /// AK3L2  | 6.90E-08    | 3.08 | 987.61   |
| 202998_s_at | ectonucleoside triphosphate diphosphohydrolase 4 /// lysyl oxidase-like 2                                                                      | ENTPD4 /// LOXL2 | 5.24E-05    | 3.07 | 103.58   |
| 220942_x_at | family with sequence similarity 162, member A                                                                                                  | FAM162A          | 1.87E-08    | 3.05 | 1,529.32 |
| 223735_at   | ADP-ribosylation factor-like 6                                                                                                                 | ARL6             | 5.12E-07    | 3.05 | 503.57   |
| 210513_s_at | vascular endothelial growth factor A                                                                                                           | VEGFA            | 4.43E-06    | 3.04 | 242.59   |
| 240991_at   | ---                                                                                                                                            | ---              | 2.29E-07    | 3.03 | 659.91   |
| 243296_at   | G0S9 mRNA, instability elements                                                                                                                | NAMPT            | 0.000195631 | 3.00 | 64.91    |
| 211559_s_at | cyclin G2                                                                                                                                      | CCNG2            | 8.47E-07    | 3.00 | 425.09   |
| 1552930_at  | membrane metallo-endopeptidase-like 1                                                                                                          | MMEL1            | 3.88E-06    | 2.98 | 253.84   |
| 208296_x_at | tumor necrosis factor, alpha-induced protein 8                                                                                                 | TNFAIP8          | 6.92E-07    | 2.98 | 455.09   |
| 201295_s_at | WD repeat and SOCS box-containing 1                                                                                                            | WSB1             | 0.000359255 | 2.94 | 52.05    |
| 202769_at   | cyclin G2                                                                                                                                      | CCNG2            | 4.44E-08    | 2.93 | 1,144.73 |
| 226542_at   | ---                                                                                                                                            | ---              | 2.44E-06    | 2.93 | 297.16   |

|              |                                                                                                                      |                    |             |      |          |
|--------------|----------------------------------------------------------------------------------------------------------------------|--------------------|-------------|------|----------|
| 236462_at    | ---                                                                                                                  | ---                | 0.000900924 | 2.90 | 36.95    |
| 230267_at    | ---                                                                                                                  | ---                | 6.69E-06    | 2.90 | 210.88   |
| 223134_at    | bobby sox homolog (Drosophila)                                                                                       | BBX                | 3.33E-05    | 2.87 | 121.36   |
| 225567_at    | ---                                                                                                                  | ---                | 4.52E-07    | 2.86 | 525.14   |
| 217226_s_at  | sideroflexin 3                                                                                                       | SFXN3              | 5.44E-07    | 2.85 | 493.38   |
| 213015_at    | bobby sox homolog (Drosophila)                                                                                       | BBX                | 9.71E-05    | 2.84 | 83.34    |
| 220974_x_at  | sideroflexin 3                                                                                                       | SFXN3              | 1.51E-06    | 2.82 | 349.98   |
| 201296_s_at  | WD repeat and SOCS box-containing 1                                                                                  | WSB1               | 2.49E-06    | 2.80 | 295.28   |
| 236884_at    | ribosomal modification protein rimK-like family member A                                                             | RIMKLA             | 7.34E-05    | 2.79 | 91.99    |
| 236266_at    | Hypothetical protein LOC283666, mRNA (cDNA clone IMAGE:4750925)                                                      | RORA               | 0.00013974  | 2.77 | 73.23    |
| 224605_at    | chromosome 4 open reading frame 3                                                                                    | C4orf3             | 5.35E-09    | 2.77 | 2,323.28 |
| 1564027_a_at | family with sequence similarity 115, member C                                                                        | FAM115C            | 2.14E-06    | 2.77 | 310.54   |
| 213700_s_at  | ---                                                                                                                  | ---                | 0.000239245 | 2.76 | 60.36    |
| 210426_x_at  | RAR-related orphan receptor A<br>pleckstrin homology domain containing, family A (phosphoinositide binding<br>specif | RORA               | 8.89E-07    | 2.76 | 418.13   |
| 217677_at    | ADP-ribosylation factor-like 6                                                                                       | PLEKHA2            | 0.000216053 | 2.75 | 62.63    |
| 235320_at    | chromosome 4 open reading frame 3                                                                                    | ARL6               | 2.23E-05    | 2.74 | 139.39   |
| 224604_at    | IKK interacting protein                                                                                              | C4orf3             | 2.50E-08    | 2.72 | 1,387.70 |
| 227295_at    | stanniocalcin 1                                                                                                      | IKIP               | 3.14E-06    | 2.72 | 272.69   |
| 204595_s_at  | tumor necrosis factor, alpha-induced protein 8                                                                       | STC1               | 1.13E-07    | 2.71 | 836.36   |
| 210260_s_at  | metallothionein 1X                                                                                                   | TNFAIP8            | 1.17E-06    | 2.71 | 381.04   |
| 208581_x_at  | epidermal growth factor receptor (erythroblastic leukemia viral (v-erb-b) oncoge                                     | MT1X               | 9.32E-08    | 2.70 | 892.94   |
| 201983_s_at  | EF-hand calcium binding domain 3 /// similar to hypoxia-inducible protein 2                                          | EGFR<br>EFCAB3 /// | 6.03E-05    | 2.69 | 98.59    |
| 1553392_at   | very low density lipoprotein receptor                                                                                | LOC100133744       | 0.00140056  | 2.69 | 31.19    |
| 209822_s_at  | adenosine A2b receptor                                                                                               | VLDLR              | 8.82E-09    | 2.68 | 1,965.19 |
| 205891_at    | hypothetical LOC387763                                                                                               | ADORA2B            | 1.97E-06    | 2.68 | 319.79   |
| 227099_s_at  | zinc finger protein 160                                                                                              | LOC387763          | 8.17E-06    | 2.67 | 196.96   |
| 1567032_s_at | protein phosphatase 2, regulatory subunit B', beta isoform                                                           | ZNF160             | 4.12E-05    | 2.67 | 112.69   |
| 635_s_at     | chromosome 18 open reading frame 19                                                                                  | PPP2R5B            | 0.000176049 | 2.67 | 67.42    |
| 235022_at    | ---                                                                                                                  | C18orf19           | 6.18E-07    | 2.67 | 472.86   |
| 227501_at    | ---                                                                                                                  | ---                | 0.000101392 | 2.67 | 82.09    |

|             |                                                          |         |             |      |          |
|-------------|----------------------------------------------------------|---------|-------------|------|----------|
| 202770_s_at | cyclin G2                                                | CCNG2   | 2.56E-06    | 2.67 | 292.42   |
| 238808_at   | ---                                                      | ---     | 0.000942387 | 2.66 | 36.32    |
| 236241_at   | mediator complex subunit 31                              | MED31   | 2.30E-05    | 2.65 | 137.83   |
| 202733_at   | prolyl 4-hydroxylase, alpha polypeptide II               | P4HA2   | 1.18E-07    | 2.65 | 825.54   |
| 227930_at   | MRNA; cDNA DKFZp547H229 (from clone DKFZp547H229)        | EIF2C4  | 7.45E-06    | 2.65 | 203.22   |
| 219622_at   | RAB20, member RAS oncogene family                        | RAB20   | 9.66E-07    | 2.65 | 406.59   |
| 37433_at    | protein inhibitor of activated STAT, 2                   | PIAS2   | 0.000147559 | 2.64 | 71.82    |
| 1568865_at  | CDNA clone IMAGE:5264828                                 | FNTB    | 0.00220135  | 2.61 | 26.10    |
| 210479_s_at | RAR-related orphan receptor A                            | RORA    | 2.88E-06    | 2.60 | 280.84   |
| 221530_s_at | basic helix-loop-helix family, member e41                | BHLHE41 | 0.000150327 | 2.59 | 71.35    |
| 241348_at   | zinc finger protein 654                                  | ZNF654  | 9.81E-08    | 2.57 | 877.67   |
| 210561_s_at | WD repeat and SOCS box-containing 1                      | WSB1    | 1.33E-08    | 2.54 | 1,713.84 |
| 222851_at   | zinc finger protein 654                                  | ZNF654  | 3.62E-06    | 2.54 | 260.00   |
| 218898_at   | family with sequence similarity 57, member A             | FAM57A  | 5.65E-07    | 2.53 | 487.21   |
| 204284_at   | protein phosphatase 1, regulatory (inhibitor) subunit 3C | PPP1R3C | 1.49E-05    | 2.53 | 160.16   |
| 244677_at   | ---                                                      | ---     | 0.000661586 | 2.52 | 41.51    |
| 226863_at   | family with sequence similarity 110, member C            | FAM110C | 2.90E-06    | 2.51 | 280.32   |
| 203986_at   | starch binding domain 1                                  | STBD1   | 2.49E-06    | 2.50 | 295.31   |
| 227409_at   | protein phosphatase 1, regulatory (inhibitor) subunit 3E | PPP1R3E | 2.60E-05    | 2.49 | 132.22   |
| 226464_at   | chromosome 3 open reading frame 58                       | C3orf58 | 7.92E-09    | 2.48 | 2,037.00 |
| 1557803_at  | ---                                                      | ---     | 2.42E-05    | 2.48 | 135.62   |
| 201673_s_at | glycogen synthase 1 (muscle)                             | GYS1    | 4.33E-05    | 2.47 | 110.69   |
| 202619_s_at | procollagen-lysine, 2-oxoglutarate 5-dioxygenase 2       | PLOD2   | 7.33E-06    | 2.47 | 204.39   |
| 224657_at   | ERBB receptor feedback inhibitor 1                       | ERRFI1  | 1.56E-06    | 2.46 | 345.76   |
| 227044_at   | ---                                                      | ---     | 1.72E-05    | 2.45 | 152.40   |
| 213629_x_at | metallothionein 1F                                       | MT1F    | 3.80E-06    | 2.45 | 255.64   |
| 225307_at   | zinc finger protein 511                                  | ZNF511  | 2.56E-08    | 2.44 | 1,376.85 |
| 204596_s_at | stanniocalcin 1                                          | STC1    | 3.82E-07    | 2.44 | 556.04   |
| 240549_at   | ---                                                      | ---     | 0.00021612  | 2.44 | 62.62    |
| 203044_at   | chondroitin sulfate synthase 1                           | CHSY1   | 5.44E-09    | 2.42 | 2,310.07 |
| 223467_at   | RAS, dexamethasone-induced 1                             | RASD1   | 2.46E-08    | 2.41 | 1,394.71 |

|             |                                                            |           |             |      |          |
|-------------|------------------------------------------------------------|-----------|-------------|------|----------|
| 228081_at   | cyclin G2                                                  | CCNG2     | 1.91E-06    | 2.41 | 322.89   |
| 209598_at   | paraneoplastic antigen MA2                                 | PNMA2     | 0.000239059 | 2.40 | 60.38    |
| 231233_at   | ---                                                        | ---       | 0.000100083 | 2.40 | 82.46    |
| 227210_at   | ---                                                        | ---       | 4.14E-06    | 2.40 | 248.26   |
| 217841_s_at | protein phosphatase methylesterase 1                       | PPME1     | 1.91E-07    | 2.39 | 702.36   |
| 204900_x_at | Sin3A-associated protein, 30kDa                            | SAP30     | 5.07E-07    | 2.39 | 505.33   |
| 208935_s_at | lectin, galactoside-binding, soluble, 8                    | LGALS8    | 0.000160406 | 2.39 | 69.71    |
| 221203_s_at | YEATS domain containing 2                                  | YEATS2    | 7.72E-08    | 2.38 | 950.84   |
| 217738_at   | nicotinamide phosphoribosyltransferase                     | NAMPT     | 2.57E-06    | 2.38 | 291.93   |
| 221566_s_at | nucleolar protein 3 (apoptosis repressor with CARD domain) | NOL3      | 6.56E-08    | 2.38 | 1,004.33 |
| 238096_at   | hypothetical protein LOC284023                             | LOC284023 | 8.78E-07    | 2.38 | 419.95   |
| 205161_s_at | peroxisomal biogenesis factor 11 alpha                     | PEX11A    | 4.34E-07    | 2.38 | 532.50   |
| 218839_at   | hairly/enhancer-of-split related with YRPW motif 1         | HEY1      | 2.17E-05    | 2.38 | 140.64   |
| 217028_at   | chemokine (C-X-C motif) receptor 4                         | CXCR4     | 0.00082952  | 2.37 | 38.12    |
| 220030_at   | serine/threonine/tyrosine kinase 1                         | STYK1     | 0.000214773 | 2.37 | 62.76    |
| 208933_s_at | lectin, galactoside-binding, soluble, 8                    | LGALS8    | 3.37E-05    | 2.36 | 120.83   |
| 243857_at   | Mrgx mRNA for MRGX                                         | MORF4L2   | 0.00125841  | 2.36 | 32.51    |
| 228149_at   | chromosome 7 open reading frame 60                         | C7orf60   | 2.92E-06    | 2.36 | 279.76   |
| 213016_at   | bobby sox homolog (Drosophila)                             | BBX       | 3.09E-06    | 2.36 | 274.34   |
| 202672_s_at | activating transcription factor 3                          | ATF3      | 3.68E-06    | 2.36 | 258.55   |
| 243806_at   | ---                                                        | ---       | 1.45E-05    | 2.36 | 161.80   |
| 229455_at   | ---                                                        | ---       | 0.000427607 | 2.35 | 48.83    |
| 239043_at   | zinc finger protein 404                                    | ZNF404    | 0.000232642 | 2.34 | 60.98    |
| 227717_at   | FLJ41603 protein                                           | FLJ41603  | 2.78E-06    | 2.33 | 284.49   |
| 202022_at   | aldolase C, fructose-bisphosphate                          | ALDOC     | 6.06E-08    | 2.33 | 1,031.53 |
| 201549_x_at | jumonji, AT rich interactive domain 1B                     | JARID1B   | 5.52E-07    | 2.32 | 491.24   |
| 226560_at   | ---                                                        | ---       | 1.50E-06    | 2.32 | 350.37   |
| 226331_at   | bobby sox homolog (Drosophila)                             | BBX       | 1.11E-05    | 2.31 | 177.39   |
| 202364_at   | MAX interactor 1                                           | MXI1      | 9.18E-07    | 2.31 | 413.62   |
| 205367_at   | SH2B adaptor protein 2                                     | SH2B2     | 5.71E-05    | 2.31 | 100.49   |
| 228262_at   | MAP7 domain containing 2                                   | MAP7D2    | 0.000484078 | 2.30 | 46.64    |

|             |                                                                                  |          |             |      |          |
|-------------|----------------------------------------------------------------------------------|----------|-------------|------|----------|
| 218096_at   | 1-acylglycerol-3-phosphate O-acyltransferase 5 (lysophosphatidic acid acyltransf | AGPAT5   | 1.14E-07    | 2.30 | 833.70   |
| 238909_at   | Calpactin I light chain, 5'UTR region                                            | S100A10  | 7.14E-07    | 2.29 | 450.39   |
| 207980_s_at | Cbp/p300-interacting transactivator, with Glu/Asp-rich carboxy-terminal domain,  | CITED2   | 7.55E-06    | 2.29 | 202.32   |
| 201310_s_at | chromosome 5 open reading frame 13                                               | C5orf13  | 6.30E-05    | 2.28 | 97.12    |
| 211919_s_at | chemokine (C-X-C motif) receptor 4                                               | CXCR4    | 0.00049829  | 2.28 | 46.14    |
| 236249_at   | IKK interacting protein                                                          | IKIP     | 3.22E-05    | 2.28 | 122.69   |
| 223172_s_at | mitochondrial protein 18 kDa                                                     | MTP18    | 2.14E-05    | 2.27 | 141.43   |
| 218276_s_at | salvador homolog 1 (Drosophila)                                                  | SAV1     | 5.45E-07    | 2.27 | 493.26   |
| 206448_at   | zinc finger protein 365                                                          | ZNF365   | 2.74E-06    | 2.26 | 285.71   |
| 209201_x_at | chemokine (C-X-C motif) receptor 4                                               | CXCR4    | 0.00033922  | 2.25 | 53.16    |
| 204859_s_at | apoptotic peptidase activating factor 1                                          | APAF1    | 0.000180049 | 2.25 | 66.88    |
| 205199_at   | carbonic anhydrase IX                                                            | CA9      | 7.82E-05    | 2.24 | 89.99    |
| 222646_s_at | ERO1-like ( <i>S. cerevisiae</i> )                                               | ERO1L    | 5.04E-07    | 2.24 | 506.29   |
| 211202_s_at | jumonji, AT rich interactive domain 1B                                           | JARID1B  | 1.56E-07    | 2.24 | 750.78   |
| 230746_s_at | ---                                                                              | ---      | 9.72E-07    | 2.24 | 405.76   |
| 234725_s_at | sema domain, immunoglobulin domain (Ig), transmembrane domain (TM) and short cyt | SEMA4B   | 1.91E-06    | 2.23 | 322.87   |
| 243683_at   | Mrgx mRNA for MRGX                                                               | MORF4L2  | 0.00165492  | 2.23 | 29.22    |
| 228280_at   | zinc finger CCCH-type, antiviral 1-like                                          | ZC3HAV1L | 0.000117049 | 2.23 | 78.01    |
| 226275_at   | MAX dimerization protein 1                                                       | MXD1     | 3.53E-06    | 2.22 | 262.20   |
| 238700_at   | ---                                                                              | ---      | 1.55E-06    | 2.22 | 346.60   |
| 226621_at   | ---                                                                              | ---      | 2.74E-08    | 2.21 | 1,345.29 |
| 231431_s_at | ---                                                                              | ---      | 6.72E-06    | 2.21 | 210.48   |
| 218697_at   | NCK interacting protein with SH3 domain                                          | NCKIPSD  | 0.000229188 | 2.20 | 61.31    |
| 229390_at   | family with sequence similarity 26, member F                                     | FAM26F   | 0.000257608 | 2.20 | 58.77    |
| 228846_at   | MAX dimerization protein 1                                                       | MXD1     | 1.50E-06    | 2.20 | 350.32   |
| 224496_s_at | transmembrane protein 107                                                        | TMEM107  | 8.80E-05    | 2.19 | 86.31    |
| 217165_x_at | metallothionein 1F                                                               | MT1F     | 1.18E-06    | 2.19 | 380.34   |
| 226199_at   | uracil phosphoribosyltransferase (FUR1) homolog ( <i>S. cerevisiae</i> )         | UPRT     | 4.00E-05    | 2.19 | 113.83   |
| 242017_at   | ---                                                                              | ---      | 0.000781195 | 2.18 | 39.00    |
| 202620_s_at | procollagen-lysine, 2-oxoglutarate 5-dioxygenase 2                               | PLOD2    | 7.31E-07    | 2.18 | 446.65   |
| 209318_x_at | pleiomorphic adenoma gene-like 1                                                 | PLAGL1   | 6.24E-05    | 2.18 | 97.40    |

|              |                                                                                  |              |             |      |          |
|--------------|----------------------------------------------------------------------------------|--------------|-------------|------|----------|
| 240063_at    | glucuronidase, beta pseudogene                                                   | LOC441046    | 5.79E-05    | 2.17 | 100.04   |
| 225962_at    | zinc and ring finger 1                                                           | ZNRF1        | 8.11E-05    | 2.17 | 88.82    |
| 214624_at    | uroplakin 1A                                                                     | UPK1A        | 0.000620848 | 2.17 | 42.51    |
| 201918_at    | solute carrier family 25, member 36                                              | SLC25A36     | 0.000699382 | 2.17 | 40.66    |
| 206461_x_at  | metallothionein 1H                                                               | MT1H         | 7.33E-06    | 2.16 | 204.35   |
| 219239_s_at  | zinc finger protein 654                                                          | ZNF654       | 1.67E-05    | 2.16 | 153.92   |
| 232008_s_at  | bobby sox homolog (Drosophila)                                                   | BBX          | 6.34E-07    | 2.16 | 468.80   |
| 210132_at    | ephrin-A3                                                                        | EFNA3        | 6.65E-06    | 2.16 | 211.31   |
| 242149_at    | chromosome 18 open reading frame 19                                              | C18orf19     | 6.77E-05    | 2.16 | 94.65    |
| 243463_s_at  | Ras-like without CAAX 1                                                          | RIT1         | 0.000213915 | 2.15 | 62.85    |
| 217739_s_at  | nicotinamide phosphoribosyltransferase                                           | NAMPT        | 8.67E-07    | 2.15 | 421.75   |
| 223135_s_at  | bobby sox homolog (Drosophila)                                                   | BBX          | 2.71E-06    | 2.15 | 286.71   |
| 209357_at    | Cbp/p300-interacting transactivator, with Glu/Asp-rich carboxy-terminal domain,  | CITED2       | 1.25E-06    | 2.15 | 372.72   |
| 232968_at    | fibronectin type III and ankyrin repeat domains 1                                | FANK1        | 4.20E-06    | 2.13 | 247.10   |
| 223045_at    | egl nine homolog 1 (C. elegans)                                                  | EGLN1        | 0.000715056 | 2.12 | 40.32    |
| 235202_x_at  | IKK interacting protein                                                          | IKIP         | 0.000370049 | 2.12 | 51.49    |
| 228696_at    | solute carrier family 45, member 3                                               | SLC45A3      | 0.00110892  | 2.12 | 34.13    |
| 228304_at    | ---                                                                              | ---          | 0.000231727 | 2.11 | 61.06    |
| 243179_at    | CDNA FLJ33993 fis, clone DFNES2007757                                            | LOC100130360 | 5.14E-05    | 2.11 | 104.24   |
| 227084_at    | dystrobrevin, alpha                                                              | DTNA         | 1.07E-05    | 2.10 | 179.32   |
| 215446_s_at  | lysyl oxidase                                                                    | LOX          | 9.64E-05    | 2.10 | 83.55    |
| 227068_at    | phosphoglycerate kinase 1                                                        | PGK1         | 4.09E-08    | 2.10 | 1,176.86 |
| 235571_at    | ---                                                                              | ---          | 3.51E-05    | 2.10 | 119.12   |
| 1555007_s_at | WD repeat domain 66                                                              | WDR66        | 0.00199916  | 2.10 | 27.12    |
| 240258_at    | enolase 1, (alpha)                                                               | ENO1         | 4.78E-05    | 2.10 | 106.95   |
| 227247_at    | Homo sapiens, clone IMAGE:4617677, mRNA                                          | PLEKHA8      | 0.000102831 | 2.09 | 81.68    |
| 200737_at    | phosphoglycerate kinase 1                                                        | PGK1         | 2.83E-07    | 2.09 | 615.22   |
| 49077_at     | protein phosphatase methylesterase 1                                             | PPME1        | 2.42E-06    | 2.08 | 297.85   |
| 213664_at    | solute carrier family 1 (neuronal/epithelial high affinity glutamate transporter | SLC1A1       | 0.000239411 | 2.08 | 60.35    |
| 228307_at    | elastin microfibril interfacer 3                                                 | EMILIN3      | 7.21E-05    | 2.08 | 92.58    |
| 201548_s_at  | jumonji, AT rich interactive domain 1B                                           | JARID1B      | 3.97E-06    | 2.08 | 251.88   |

|              |                                                                        |          |             |      |        |
|--------------|------------------------------------------------------------------------|----------|-------------|------|--------|
| 232002_at    | ---                                                                    | ---      | 0.00141083  | 2.08 | 31.10  |
| 221523_s_at  | Ras-related GTP binding D                                              | RRAGD    | 0.00176517  | 2.07 | 28.49  |
| 208936_x_at  | lectin, galactoside-binding, soluble, 8                                | LGALS8   | 7.11E-08    | 2.07 | 977.60 |
| 230523_at    | ---                                                                    | ---      | 3.03E-05    | 2.07 | 125.43 |
| 228914_at    | ---                                                                    | ---      | 0.000211079 | 2.07 | 63.16  |
| 207992_s_at  | adenosine monophosphate deaminase (isoform E)                          | AMPD3    | 0.000644973 | 2.07 | 41.91  |
| 212492_s_at  | jumonji domain containing 2B                                           | JMJD2B   | 0.000184814 | 2.06 | 66.25  |
| 207785_s_at  | recombination signal binding protein for immunoglobulin kappa J region | RBPJ     | 8.53E-07    | 2.06 | 424.12 |
| 222662_at    | protein phosphatase 1, regulatory (inhibitor) subunit 3B               | PPP1R3B  | 0.000121761 | 2.05 | 76.92  |
| 205160_at    | MRNA full length insert cDNA clone EUROIMAGE 202740                    | PEX11A   | 6.24E-06    | 2.05 | 215.90 |
| 223441_at    | solute carrier family 17 (anion/sugar transporter), member 5           | SLC17A5  | 0.000516001 | 2.05 | 45.55  |
| 212850_s_at  | low density lipoprotein receptor-related protein 4                     | LRP4     | 0.00119818  | 2.05 | 33.13  |
| 212444_at    | ---                                                                    | ---      | 1.25E-05    | 2.05 | 170.15 |
| 222383_s_at  | arachidonate lipoxygenase 3                                            | ALOXE3   | 0.000132369 | 2.05 | 74.66  |
| 225239_at    | ---                                                                    | ---      | 0.00134043  | 2.05 | 31.72  |
| 204521_at    | chromosome 12 open reading frame 24                                    | C12orf24 | 5.55E-06    | 2.04 | 224.70 |
| 206070_s_at  | EPH receptor A3                                                        | EPHA3    | 1.22E-05    | 2.04 | 171.48 |
| 212188_at    | potassium channel tetramerisation domain containing 12                 | KCTD12   | 0.000344968 | 2.04 | 52.83  |
| 212368_at    | zinc finger protein 292                                                | ZNF292   | 5.23E-05    | 2.04 | 103.62 |
| 236223_s_at  | Small G protein RIBB                                                   | RIT1     | 3.52E-05    | 2.04 | 118.99 |
| 228033_at    | E2F transcription factor 7                                             | E2F7     | 4.60E-07    | 2.03 | 522.12 |
| 228919_at    | ---                                                                    | ---      | 0.000187154 | 2.03 | 65.95  |
| 201917_s_at  | solute carrier family 25, member 36                                    | SLC25A36 | 0.000143128 | 2.02 | 72.61  |
| 212185_x_at  | metallothionein 2A                                                     | MT2A     | 4.04E-06    | 2.02 | 250.32 |
| 239315_at    | family with sequence similarity 115, member C                          | FAM115C  | 2.96E-05    | 2.02 | 126.39 |
| 1555167_s_at | nicotinamide phosphoribosyltransferase                                 | NAMPT    | 8.46E-06    | 2.02 | 194.57 |
| 226114_at    | zinc finger protein 436                                                | ZNF436   | 5.06E-05    | 2.01 | 104.83 |
| 228188_at    | FOS-like antigen 2                                                     | FOSL2    | 2.18E-06    | 2.01 | 308.95 |
| 212366_at    | zinc finger protein 292                                                | ZNF292   | 0.000393001 | 2.01 | 50.37  |
| 204172_at    | coproporphyrinogen oxidase                                             | CPOX     | 0.000160283 | 2.00 | 69.73  |
| 209034_at    | proline-rich nuclear receptor coactivator 1                            | PNRC1    | 1.60E-05    | 2.00 | 156.30 |



## Genes down-regulated by HQBA

| Column ID   | Gene Title                                                                       | Gene Symbol      | p-value (Treatment) | Ratio(MCF7 treatment vs. control) | F(Treatment) |
|-------------|----------------------------------------------------------------------------------|------------------|---------------------|-----------------------------------|--------------|
| 222902_s_at | defects in morphology 1 homolog (S. cerevisiae)                                  | DEM1             | 2.30E-05            | 0.67                              | 137.88       |
| 211580_s_at | phosphoinositide-3-kinase, regulatory subunit 3 (gamma)                          | PIK3R3           | 4.26E-04            | 0.66                              | 48.91        |
| 213116_at   | NIMA (never in mitosis gene a)-related kinase 3                                  | NEK3             | 2.08E-03            | 0.66                              | 26.73        |
| 213005_s_at | KN motif and ankyrin repeat domains 1                                            | KANK1            | 1.30E-03            | 0.66                              | 32.12        |
| 227750_at   | kalirin, RhoGEF kinase                                                           | KALRN            | 3.81E-05            | 0.66                              | 115.74       |
| 204826_at   | cyclin F                                                                         | CCNF             | 9.01E-04            | 0.66                              | 36.95        |
| 220038_at   | chromosome 8 open reading frame 44 /// serum/glucocorticoid regulated kinase fam | C8orf44 /// SGK3 | 1.45E-03            | 0.66                              | 30.73        |
| 209567_at   | RRS1 ribosome biogenesis regulator homolog (S. cerevisiae)                       | RRS1             | 6.33E-05            | 0.66                              | 96.95        |
| 225473_at   | chromosome 20 open reading frame 117                                             | C20orf117        | 4.29E-04            | 0.66                              | 48.75        |
| 220215_at   | zinc finger protein 669                                                          | ZNF669           | 2.62E-04            | 0.66                              | 58.37        |
| 215359_x_at | zinc finger protein 44                                                           | ZNF44            | 1.96E-03            | 0.66                              | 27.32        |
| 219765_at   | zinc finger protein 329                                                          | ZNF329           | 1.64E-03            | 0.66                              | 29.33        |
| 222883_at   | chromosome 1 open reading frame 163                                              | C1orf163         | 2.11E-04            | 0.66                              | 63.14        |
| 204162_at   | NDC80 homolog, kinetochore complex component (S. cerevisiae)                     | NDC80            | 5.20E-04            | 0.65                              | 45.43        |
| 235289_at   | eukaryotic translation initiation factor 5A2                                     | EIF5A2           | 4.61E-04            | 0.65                              | 47.50        |
| 205928_at   | zinc finger protein 443                                                          | ZNF443           | 1.02E-04            | 0.65                              | 81.80        |
| 236313_at   | cyclin-dependent kinase inhibitor 2B (p15, inhibits CDK4)                        | CDKN2B           | 6.62E-04            | 0.65                              | 41.51        |
| 213352_at   | transmembrane and coiled-coil domain family 1                                    | TMCC1            | 2.34E-04            | 0.65                              | 60.84        |
| 221268_s_at | sphingosine-1-phosphate phosphatase 1                                            | SGPP1            | 2.72E-04            | 0.65                              | 57.59        |
| 212660_at   | PHD finger protein 15                                                            | PHF15            | 1.17E-05            | 0.65                              | 174.16       |
| 202150_s_at | neural precursor cell expressed, developmentally down-regulated 9                | NEDD9            | 5.79E-05            | 0.65                              | 100.02       |
| 200790_at   | ornithine decarboxylase 1                                                        | ODC1             | 3.21E-04            | 0.65                              | 54.24        |
| 242463_x_at | zinc finger protein 600                                                          | ZNF600           | 4.39E-04            | 0.65                              | 48.35        |
| 222958_s_at | DEP domain containing 1                                                          | DEPDC1           | 1.62E-03            | 0.65                              | 29.47        |
| 202437_s_at | cytochrome P450, family 1, subfamily B, polypeptide 1                            | CYP1B1           | 3.95E-04            | 0.64                              | 50.27        |
| 204914_s_at | SRY (sex determining region Y)-box 11                                            | SOX11            | 2.15E-04            | 0.64                              | 62.76        |

|             |                                                                                                                      |               |          |      |        |
|-------------|----------------------------------------------------------------------------------------------------------------------|---------------|----------|------|--------|
| 220295_x_at | DEP domain containing 1                                                                                              | DEPDC1        | 1.10E-03 | 0.64 | 34.21  |
| 206261_at   | zinc finger protein 239                                                                                              | ZNF239        | 8.78E-06 | 0.64 | 192.16 |
| 220721_at   | zinc finger protein 614                                                                                              | ZNF614        | 4.54E-04 | 0.64 | 47.74  |
| 213916_at   | zinc finger protein 20                                                                                               | ZNF20         | 1.72E-04 | 0.64 | 68.00  |
| 221213_s_at | zinc finger protein 280D                                                                                             | ZNF280D       | 6.24E-04 | 0.64 | 42.44  |
| 227445_at   | zinc finger protein 689                                                                                              | ZNF689        | 6.28E-05 | 0.64 | 97.22  |
| 211721_s_at | zinc finger protein 551                                                                                              | ZNF551        | 8.85E-05 | 0.64 | 86.13  |
| 242828_at   | fidgetin                                                                                                             | FIGN          | 1.92E-03 | 0.64 | 27.58  |
| 225748_at   | LTV1 homolog ( <i>S. cerevisiae</i> )                                                                                | LTV1          | 5.33E-06 | 0.64 | 227.85 |
| 213351_s_at | transmembrane and coiled-coil domain family 1                                                                        | TMCC1         | 1.36E-03 | 0.64 | 31.57  |
| 224365_s_at | tigger transposable element derived 7                                                                                | TIGD7         | 7.35E-04 | 0.64 | 39.91  |
| 210447_at   | glutamate dehydrogenase 2                                                                                            | GLUD2         | 5.69E-04 | 0.63 | 43.91  |
| 225917_at   | ---                                                                                                                  | ---           | 1.81E-03 | 0.63 | 28.20  |
| 217202_s_at | glutamate-ammonia ligase (glutamine synthetase)                                                                      | GLUL          | 2.08E-05 | 0.63 | 142.88 |
| 227294_at   | zinc finger protein 689                                                                                              | ZNF689        | 2.65E-06 | 0.63 | 288.94 |
| 202436_s_at | cytochrome P450, family 1, subfamily B, polypeptide 1                                                                | CYP1B1        | 3.09E-04 | 0.63 | 55.00  |
| 203373_at   | suppressor of cytokine signaling 2                                                                                   | SOCS2         | 2.20E-05 | 0.63 | 140.17 |
| 204092_s_at | aurora kinase A                                                                                                      | AURKA         | 5.12E-04 | 0.63 | 45.66  |
| 203372_s_at | suppressor of cytokine signaling 2                                                                                   | SOCS2         | 1.13E-03 | 0.63 | 33.89  |
| 230960_at   | immunoglobulin superfamily, DCC subclass, member 3                                                                   | IGDCC3        | 1.27E-03 | 0.63 | 32.35  |
| 206182_at   | zinc finger protein 134                                                                                              | ZNF134        | 1.49E-04 | 0.62 | 71.55  |
| 226021_at   | retinol dehydrogenase 10 (all-trans)                                                                                 | RDH10         | 3.95E-04 | 0.61 | 50.28  |
| 231741_at   | sphingosine-1-phosphate receptor 3                                                                                   | S1PR3         | 4.16E-04 | 0.61 | 49.31  |
| 204709_s_at | kinesin family member 23                                                                                             | KIF23         | 1.52E-03 | 0.61 | 30.22  |
| 222670_s_at | v-maf musculoaponeurotic fibrosarcoma oncogene homolog B (avian)                                                     | MAFB          | 1.51E-04 | 0.61 | 71.20  |
| 219010_at   | chromosome 1 open reading frame 106                                                                                  | C1orf106      | 3.86E-05 | 0.61 | 115.25 |
| 230421_at   | similar to hypothetical protein 9630041N07                                                                           | DKFZp686E2433 | 9.70E-05 | 0.61 | 83.38  |
| 235061_at   | protein phosphatase 1K (PP2C domain containing)<br>hypoxia inducible factor 1, alpha subunit (basic helix-loop-helix | PPM1K         | 3.24E-04 | 0.61 | 54.04  |
| 200989_at   | transcription                                                                                                        | HIF1A         | 3.19E-07 | 0.61 | 590.60 |
| 232645_at   | hypothetical LOC153684                                                                                               | LOC153684     | 8.94E-05 | 0.60 | 85.81  |

|             |                                                                   |         |          |      |        |
|-------------|-------------------------------------------------------------------|---------|----------|------|--------|
| 206695_x_at | zinc finger protein 43                                            | ZNF43   | 1.01E-06 | 0.60 | 400.40 |
| 235728_at   | zinc finger protein 3 homolog (mouse)                             | ZFP3    | 2.18E-04 | 0.60 | 62.46  |
| 227045_at   | zinc finger protein 614                                           | ZNF614  | 1.06E-03 | 0.60 | 34.69  |
| 204519_s_at | plasma membrane proteolipid (plasmolipin)                         | PLLP    | 1.10E-03 | 0.60 | 34.29  |
| 204937_s_at | zinc finger protein 274                                           | ZNF274  | 4.81E-06 | 0.60 | 235.99 |
| 208079_s_at | aurora kinase A                                                   | AURKA   | 5.83E-05 | 0.60 | 99.78  |
| 220936_s_at | H2A histone family, member J                                      | H2AFJ   | 2.18E-03 | 0.59 | 26.20  |
| 218490_s_at | zinc finger protein 302                                           | ZNF302  | 1.30E-03 | 0.59 | 32.10  |
| 227687_at   | hydroletharus syndrome 1                                          | HYLS1   | 1.66E-05 | 0.59 | 154.53 |
| 225687_at   | family with sequence similarity 83, member D                      | FAM83D  | 1.71E-03 | 0.59 | 28.88  |
| 203817_at   | guanylate cyclase 1, soluble, beta 3                              | GUCY1B3 | 6.49E-04 | 0.59 | 41.81  |
| 207304_at   | zinc finger protein 45                                            | ZNF45   | 7.44E-05 | 0.59 | 91.58  |
| 215001_s_at | glutamate-ammonia ligase (glutamine synthetase)                   | GLUL    | 5.42E-06 | 0.59 | 226.59 |
| 232278_s_at | DEP domain containing 1                                           | DEPDC1  | 1.37E-03 | 0.59 | 31.42  |
| 202435_s_at | cytochrome P450, family 1, subfamily B, polypeptide 1             | CYP1B1  | 8.31E-05 | 0.58 | 88.08  |
| 202149_at   | neural precursor cell expressed, developmentally down-regulated 9 | NEDD9   | 3.86E-05 | 0.58 | 115.26 |
| 218574_s_at | LIM and cysteine-rich domains 1                                   | LMCD1   | 4.67E-06 | 0.58 | 238.34 |
| 218559_s_at | v-maf musculoaponeurotic fibrosarcoma oncogene homolog B (avian)  | MAFB    | 2.00E-04 | 0.58 | 64.44  |
| 204913_s_at | SRY (sex determining region Y)-box 11                             | SOX11   | 2.33E-03 | 0.57 | 25.52  |
| 202870_s_at | cell division cycle 20 homolog (S. cerevisiae)                    | CDC20   | 7.41E-04 | 0.57 | 39.78  |
| 214751_at   | zinc finger protein 468                                           | ZNF468  | 6.55E-05 | 0.57 | 95.78  |
| 200648_s_at | glutamate-ammonia ligase (glutamine synthetase)                   | GLUL    | 1.25E-06 | 0.57 | 372.71 |
| 240633_at   | docking protein 7                                                 | DOK7    | 9.25E-06 | 0.57 | 188.72 |
| 218987_at   | activating transcription factor 7 interacting protein             | ATF7IP  | 3.54E-05 | 0.56 | 118.74 |
| 213721_at   | SRY (sex determining region Y)-box 2                              | SOX2    | 9.71E-05 | 0.55 | 83.34  |
| 219615_s_at | potassium channel, subfamily K, member 5                          | KCNK5   | 1.83E-04 | 0.55 | 66.55  |
| 238149_at   | zinc finger protein 818 pseudogene                                | ZNF818P | 2.44E-03 | 0.55 | 25.06  |
| 243174_at   | ---                                                               | ---     | 3.50E-05 | 0.55 | 119.24 |
| 238148_s_at | zinc finger protein 818 pseudogene                                | ZNF818P | 8.37E-04 | 0.54 | 37.99  |
| 227670_at   | zinc finger protein 75a                                           | ZNF75A  | 4.42E-05 | 0.53 | 109.94 |
| 218694_at   | armadillo repeat containing, X-linked 1                           | ARMCX1  | 7.64E-06 | 0.53 | 201.49 |

|             |                                                                                  |                  |          |      |        |
|-------------|----------------------------------------------------------------------------------|------------------|----------|------|--------|
| 228038_at   | SRY (sex determining region Y)-box 2                                             | SOX2             | 2.35E-07 | 0.52 | 655.00 |
| 228176_at   | sphingosine-1-phosphate receptor 3                                               | S1PR3            | 5.32E-06 | 0.52 | 228.06 |
| 204962_s_at | centromere protein A                                                             | CENPA            | 1.07E-03 | 0.51 | 34.60  |
| 209631_s_at | G protein-coupled receptor 37 (endothelin receptor type B-like)                  | GPR37            | 7.42E-05 | 0.51 | 91.67  |
| 202434_s_at | cytochrome P450, family 1, subfamily B, polypeptide 1                            | CYP1B1           | 1.03E-03 | 0.51 | 35.13  |
| 211778_s_at | ovo-like 2 (Drosophila)                                                          | OVOL2            | 1.35E-04 | 0.51 | 74.21  |
| 201739_at   | serum/glucocorticoid regulated kinase 1                                          | SGK1             | 9.55E-06 | 0.50 | 186.69 |
| 205749_at   | cytochrome P450, family 1, subfamily A, polypeptide 1                            | CYP1A1           | 1.29E-04 | 0.50 | 75.43  |
| 206900_x_at | zinc finger protein 253                                                          | ZNF253           | 1.10E-07 | 0.49 | 844.11 |
| 229518_at   | family with sequence similarity 46, member B                                     | FAM46B           | 1.45E-04 | 0.49 | 72.21  |
| 206683_at   | zinc finger protein 165                                                          | ZNF165           | 1.76E-05 | 0.49 | 151.18 |
| 225834_at   | family with sequence similarity 72, member A /// family with sequence similarity | FAM72A ///       |          |      |        |
| 209987_s_at | achaete-scute complex homolog 1 (Drosophila)                                     | FAM72B /// GCUD2 | 7.05E-05 | 0.47 | 93.34  |
| 242919_at   | zinc finger protein 253                                                          | ASCL1            | 2.16E-03 | 0.46 | 26.30  |
| 213780_at   | trichohyalin                                                                     | ZNF253           | 9.64E-07 | 0.41 | 406.96 |
|             |                                                                                  | TCHH             | 1.48E-04 | 0.37 | 71.78  |
|             |                                                                                  | HIST1H4A ///     |          |      |        |
|             |                                                                                  | HIST1H4B ///     |          |      |        |
|             |                                                                                  | HIST1H4C ///     |          |      |        |
|             |                                                                                  | HIST1H4D ///     |          |      |        |
|             |                                                                                  | HIST1H4E ///     |          |      |        |
|             |                                                                                  | HIST1H4F ///     |          |      |        |
|             |                                                                                  | HIST1H4H ///     |          |      |        |
|             |                                                                                  | HIST1H4I ///     |          |      |        |
|             |                                                                                  | HIST1H4J ///     |          |      |        |
|             |                                                                                  | HIST1H4K ///     |          |      |        |
|             |                                                                                  | HIST1H4L ///     |          |      |        |
|             |                                                                                  | HIST2H4A ///     |          |      |        |
|             |                                                                                  | HIST2H4B ///     |          |      |        |
| 205967_at   | histone cluster 1, H4a /// histone cluster 1, H4b /// histone cluster 1, H4c /// | HIST4H4          | 1.31E-06 | 0.23 | 367.10 |
